# Supplementary material
Source: Royal Society of Chemistry journal article supplement (doi:10.1039/d6tc00785f)
Supplement: d6tc00785f1.pdf [file d6tc00785f1.pdf]

## Supplementary Information

# Localized Plasmonic Reconstruction via Xenon Photoactivation for High-Sensitivity SERS Substrates

Johan Iskandar,<sup>ab</sup> Chih-Yi Liu,<sup>bcg</sup> Dian Luo,<sup>be</sup> Chih-Chien Lee,<sup>d</sup> Shun-Wei Liu,<sup>bef\*</sup>

<sup>a</sup>Department of Artificial Intelligence and Robotics, Universitas Pakuan, Bogor 16143, Indonesia

<sup>b</sup>Organic Electronics Research Center, Ming Chi University of Technology, New Taipei City 243303, Taiwan

<sup>c</sup>College of Engineering, Ming Chi University of Technology, New Taipei City 243303, Taiwan

<sup>d</sup>Department of Electronic Engineering, National Taiwan University of Science and Technology, Taipei City 106335, Taiwan

<sup>e</sup>Department of Electronic Engineering, Ming Chi University of Technology, New Taipei City 243303, Taiwan

<sup>f</sup>Center for Sustainability and Energy Technologies, Chang Gung University, Taoyuan 33302, Taiwan

<sup>g</sup>Department of Electrical Engineering, Tunghai University, Taichung City 407224, Taiwan.

\*Corresponding author: [swliu@mail.mcut.edu.tw](mailto:swliu@mail.mcut.edu.tw)

**Table S1.** Comparison of current work status to prior study.

| Substrate                            | Analyte                | EF    | Pre-irradiation time (second) | Pre-irradiation light source | References |
|--------------------------------------|------------------------|-------|-------------------------------|------------------------------|------------|
| AuNPs/TiO <sub>2</sub>               | Rhodamine 6G           | ~3    | 14400                         | UV light 254 nm              | [1]        |
| AuNPs blended TiO <sub>2</sub>       | Mercaptobenzoic acid   | ~13.2 | 10800                         | UV light 254 nm              | [2]        |
| AgNPs/LN/SiO <sub>2</sub> /Si        | 4-Aminothiophenol      | ~7    | 9000                          | UV light 254 nm              | [3]        |
| AgNPs@TiO <sub>2</sub>               | Adenosine triphosphate | ~3    | 1800                          | UV light 365 nm              | [4]        |
| AgNPs-TiO <sub>2</sub>               | Thiram                 | ~27.8 | 1440                          | Mercury lamp                 | [5]        |
| TiO <sub>2</sub> -Ag nanopore arrays | Crystal violet         | ~8    | 1260                          | Mercury lamp                 | [6]        |
| AuNPs/ZnO                            | Methylene blue         | ~5.5  | 600                           | UV light 365 nm              | [7]        |
| AgNPs/AZO/AgNPs                      | Rhodamine 6G           | ~103  | 600                           | UV light 365 nm              | [8]        |
| AgNPs/TiO <sub>2</sub>               | Rhodamine 6G           | ~50   | 480                           | UV light 365 nm              | [9]        |
| AgNPs/AZO/AgNPs                      | Rhodamine 6G           | ~8    | 6                             | XENON X-1100                 | This Work  |

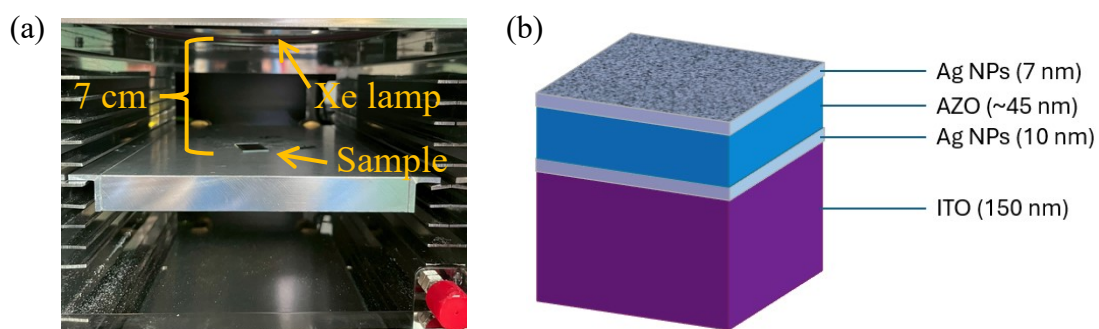

**Fig. S1.** (a) Xenon X-1100 sample compartment and (b) SERS substrate structure.

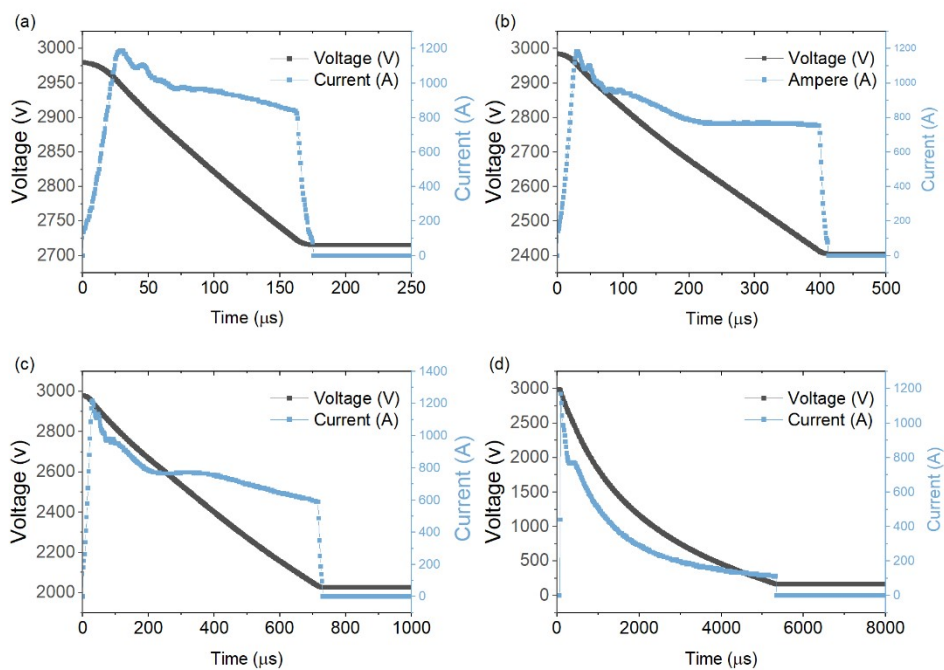

**Fig. S2.** Pulsed electrical discharge profile. (a) 500 J, (b) 1000 J, (c) 1500 J, and (d) 2500 J.

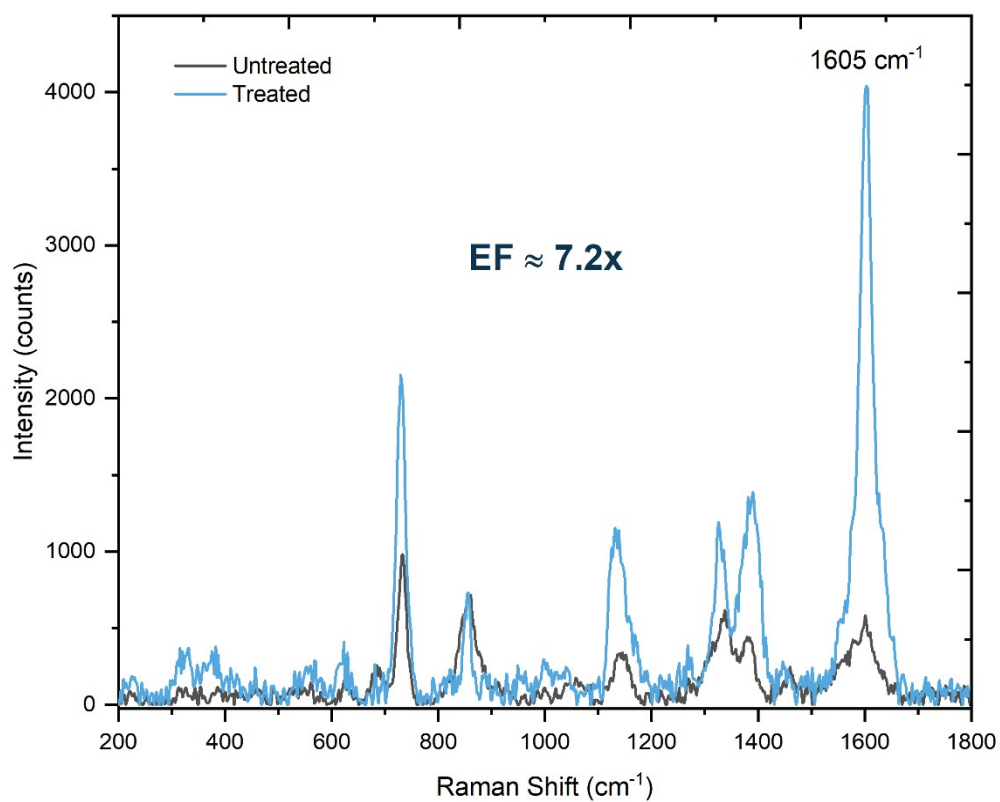

**Fig. S3.** Enhancement factor (EF) of adenine evaluated at the characteristic Raman peak at  $1605 \text{ cm}^{-1}$ .

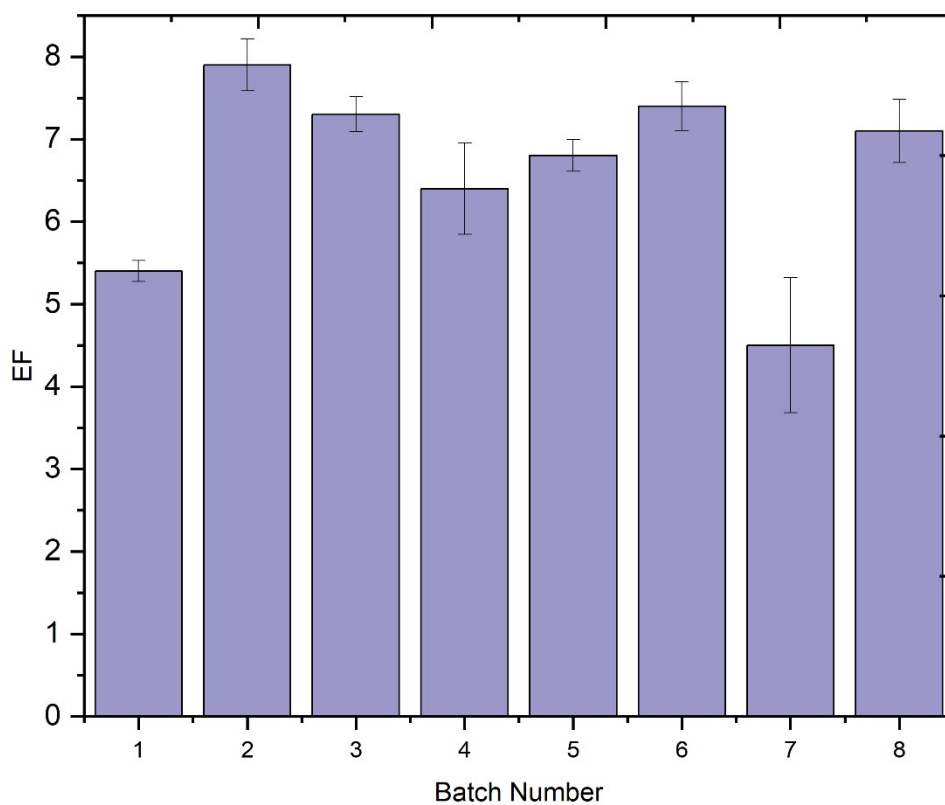

**Fig. S4.** Batch-to-batch reproducibility of the SERS performance of the AZO-2Ag substrates evaluated across 8 independent fabrication batches.

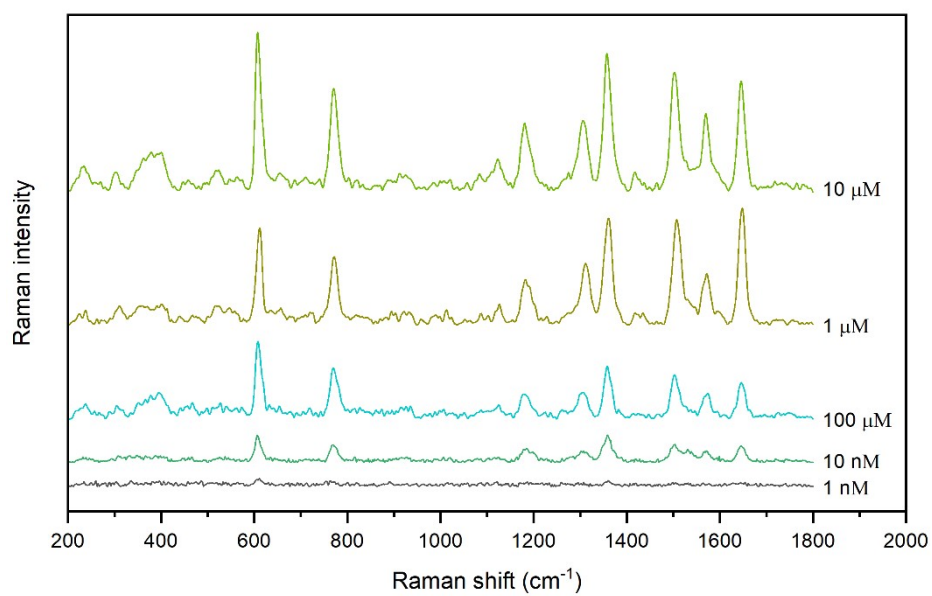

**Fig. S5.** Limit of detection (LOD) of the untreated sample.

## Supplementary References

- [1] V.T. Tran, M.P. Le, N.H. Pham, T.H.Y. Le, V.T. Nguyen, T.H. Pham, T.S. Nguyen, Q.H. Nguyen, V.T. Pham, T.T. Nguyen, C.T. Nguyen, A.B. Ngac, O. Martínez Sacristán, T.H. Tran, Unraveling the mechanism of photo-induced surface enhanced Raman scattering on ZnO/Au thin films, *Appl. Surf. Sci.* 657 (2024). <https://doi.org/10.1016/j.apsusc.2024.159785>.
- [2] S. Ben-Jaber, W.J. Peveler, R. Quesada-Cabrera, E. Cortés, C. Sotelo-Vazquez, N. Abdul-Karim, S.A. Maier, I.P. Parkin, Photo-induced enhanced Raman spectroscopy for universal ultra-trace detection of explosives, pollutants and biomolecules, *Nat. Commun.* 7 (2016) 1–6. <https://doi.org/10.1038/ncomms12189>.
- [3] J. Shondo, S. Veziroglu, T. Tjardts, T. Bin Sarwar, Y.K. Mishra, F. Faupel, O.C. Aktas, Nanoscale Synergetic Effects on Ag–TiO<sub>2</sub> Hybrid Substrate for Photoinduced Enhanced Raman Spectroscopy (PIERS) with Ultra-Sensitivity and Reusability, *Small* 18 (2022). <https://doi.org/10.1002/sml.202203861>.
- [4] L. Zhang, X. Lu, J. Sun, C. Wang, P. Dong, Insights into the plasmonic “hot spots” and efficient hot electron injection induced by Ag nanoparticles in a covalent organic framework for photocatalytic H<sub>2</sub> evolution, *J. Mater. Chem. A* 12 (2024) 5392–5405. <https://doi.org/10.1039/d3ta06724f>.
- [5] M. Zhang, H. Sun, X. Chen, J. Yang, L. Shi, T. Chen, Z. Bao, J. Liu, Y. Wu, Highly Efficient Photoinduced Enhanced Raman Spectroscopy (PIERS) from Plasmonic Nanoparticles Decorated 3D Semiconductor Arrays for Ultrasensitive, Portable, and Recyclable Detection of Organic Pollutants, *ACS Sensors* 4 (2019) 1670–1681. <https://doi.org/10.1021/acssensors.9b00562>.
- [6] T. Man, W. Lai, M. Xiao, X. Wang, A.R. Chandrasekaran, H. Pei, L. Li, A versatile

- biomolecular detection platform based on photo-induced enhanced Raman spectroscopy, *Biosens. Bioelectron.* 147 (2020).  
<https://doi.org/10.1016/j.bios.2019.111742>.
- [7] R.M. Al-Shammari, M.A. Baghban, N. Al-Attar, A. Gowen, K. Gallo, J.H. Rice, B.J. Rodriguez, Photoinduced Enhanced Raman from Lithium Niobate on Insulator Template, *ACS Appl. Mater. Interfaces* 10 (2018) 30871–30878.  
<https://doi.org/10.1021/acsami.8b10076>.
- [8] J. Iskandar, C. Liu, M. Huang, D. Luo, C. Lee, S. Liu, Sensors and Actuators : B . Chemical Synergistic alignment of Ag fermi level and AZO conduction band for unprecedented PIERS enhancement in ITO / Ag / AZO / Ag multilayer architectures, *Sensors Actuators B. Chem.* 440 (2025) 137930.  
<https://doi.org/10.1016/j.snb.2025.137930>.
- [9] M. Zhang, T. Chen, Y. Liu, J. Zhu, J. Liu, Y. Wu, Three-Dimensional TiO<sub>2</sub>-Ag Nanopore Arrays for Powerful Photoinduced Enhanced Raman Spectroscopy (PIERS) and Versatile Detection of Toxic Organics, *ChemNanoMat* 5 (2019) 55–60.  
<https://doi.org/10.1002/cnma.201800389>.
